# Supplementary material
Source: MDPI journal article supplement (https://www.mdpi.com/1424-8247/16/5/693)
Supplement: s1 [file s1]

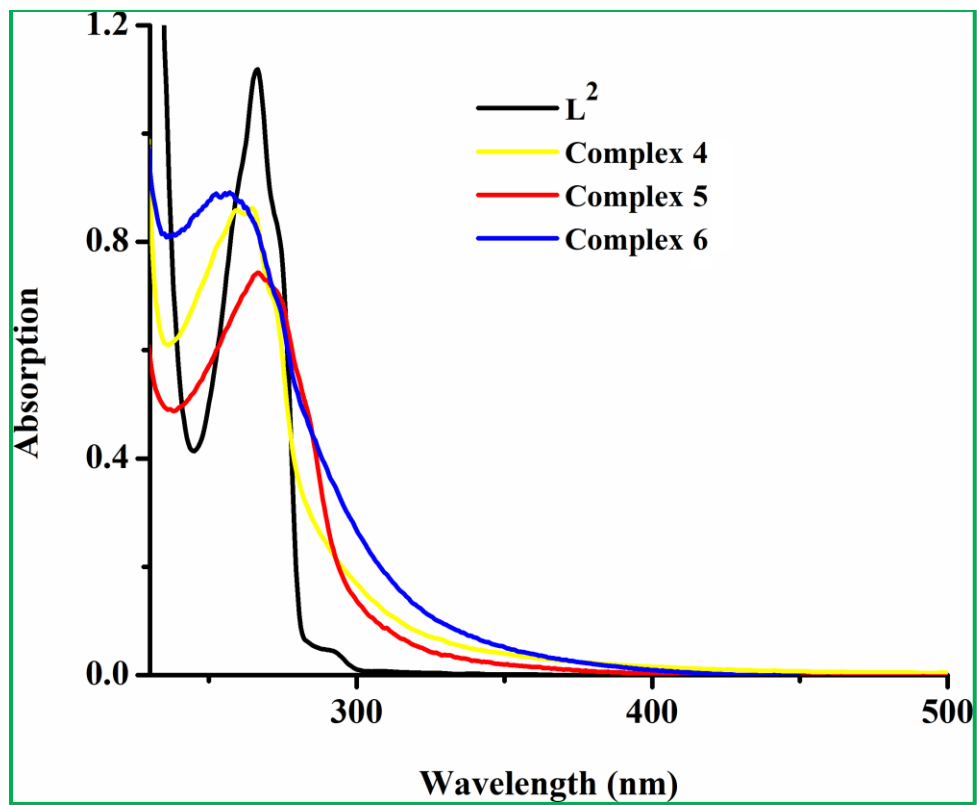

Figure S1. UV-Visible absorption spectrum of ligand  $L^2$  and complexes 4-6 in ethanol.

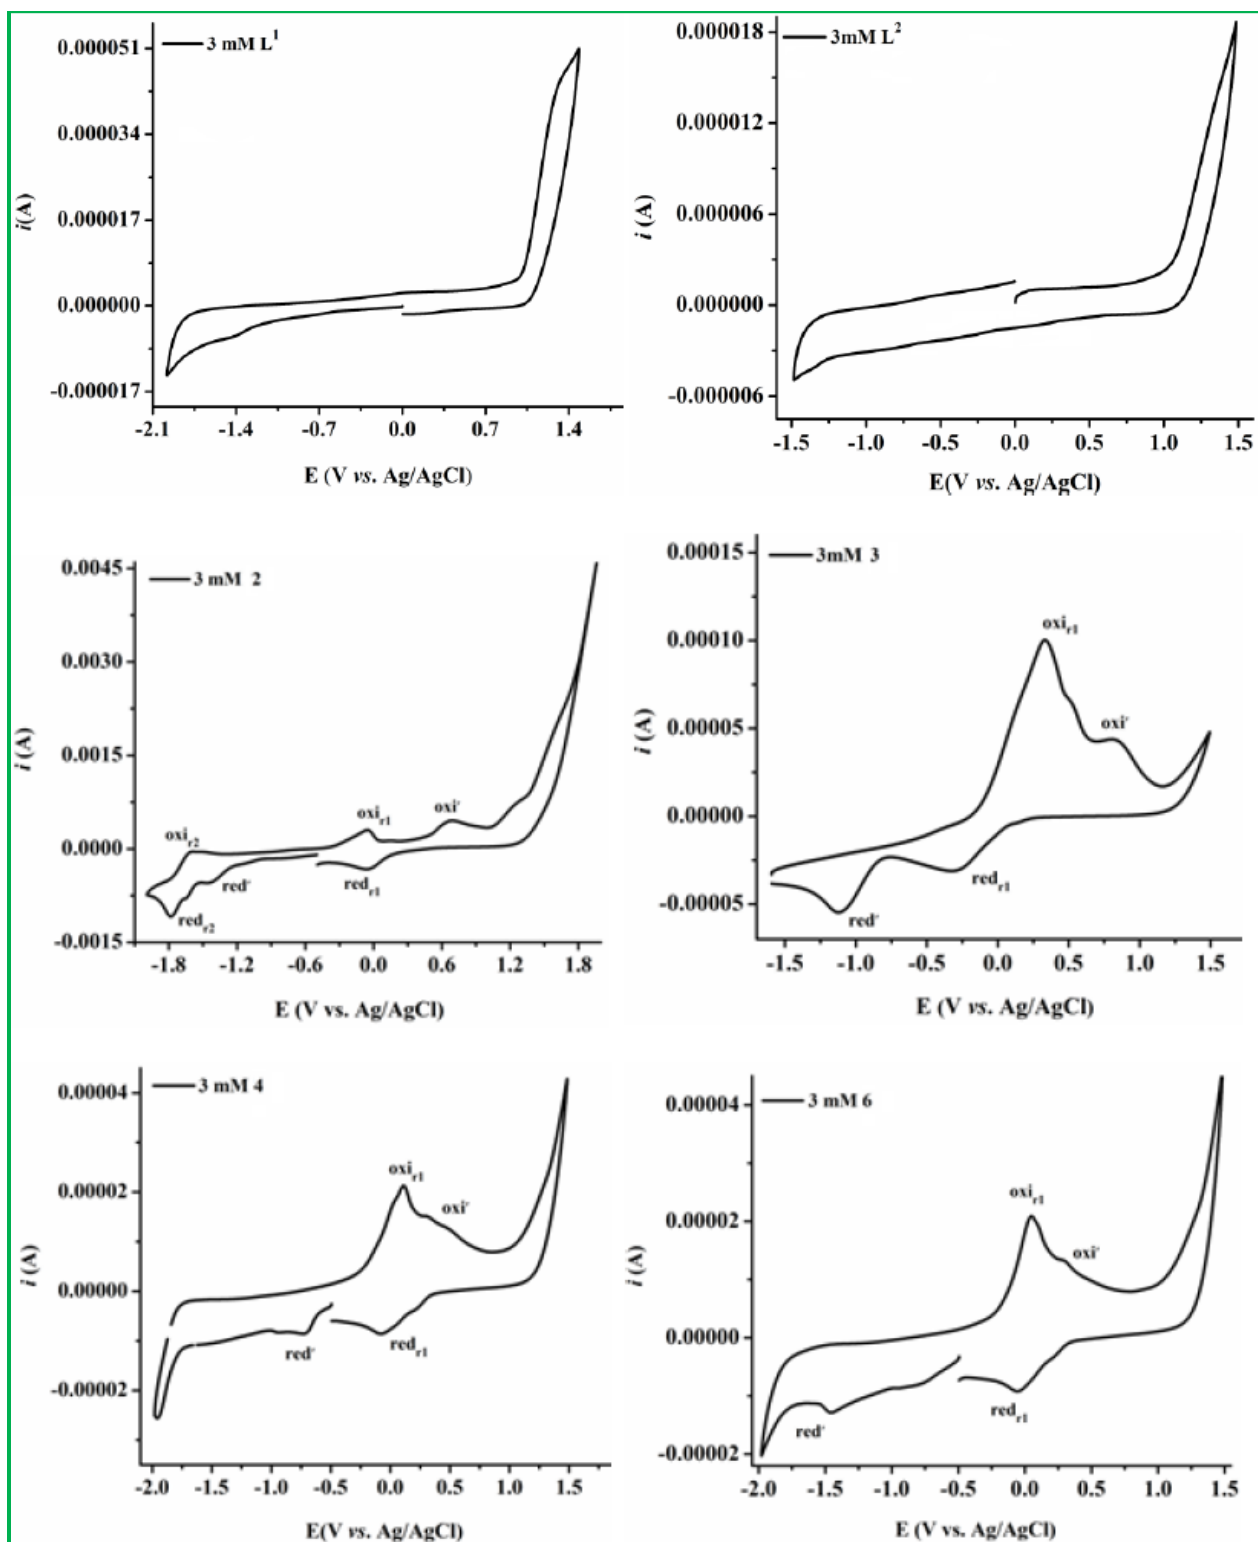

Figure S2. Cyclic voltammograms of Ligand  $L^1$ ,  $L^2$  and complexes 2-4 and 6

Table S1. Electrochemical parameter for complexes **1-6** before and after DNA addition

| Comp.    | E (V) before DNA |                |                  | E (V) after DNA  |                  |                    | Change in potentials |                 |                   |
|----------|------------------|----------------|------------------|------------------|------------------|--------------------|----------------------|-----------------|-------------------|
|          | E <sub>a</sub>   | E <sub>c</sub> | E <sub>1/2</sub> | E <sub>a</sub> ' | E <sub>c</sub> ' | E <sub>1/2</sub> ' | ΔE <sub>a</sub>      | ΔE <sub>c</sub> | ΔE <sub>1/2</sub> |
| <b>1</b> | 0.478            | n.o            | -                | 0.535            | n.o              | -                  | 0.056                |                 |                   |
|          | 0.203            | -0.268         | -0.032           | 0.336            | -0.158           | 0.088              | 0.132                | 0.109           | 0.012             |
|          | n.o              | -1.016         | -                | n.o              | -0.591           |                    | -                    | 0.424           |                   |
|          | 0.690            | n.o            |                  | 0.821            | n.o              |                    | 0.131                |                 |                   |
| <b>2</b> | -0.049           | -0.055         | -0.052           | 0.271            | 0.031            | 0.151              | 0.321                | 0.087           | 0.20              |
|          | n.o              | -1.428         |                  | n.o              | -1.145           |                    | -                    | 0.283           |                   |
|          | -1.602           | -1.780         | -3.383           | -1.413           | -1.638           | -1.525             | 0.189                | 0.142           | 1.85              |
|          | 0.846            | n.o            |                  | disappear        | n.o              |                    | -                    | -               |                   |
| <b>3</b> | 0.326            | -0.327         | -5E-05           | 0.511            | -0.267           | 0.121              | 0.184                | 0.059           | 1.21E-01          |
| <b>4</b> | n.o              | -1.122         |                  | n.o              | 0.611            |                    |                      | 1.734           |                   |
|          | 0.315            | n.o            |                  | 0.318            | n.o              |                    | 0.002                |                 |                   |
|          | 0.112            | -0.076         | 0.01785          | 0.134            | -0.047           | 0.110              | 0.021                | 0.028           | 0.092             |
|          | n.O              | -0.723         |                  | n.o              | disappear        |                    |                      |                 |                   |
| <b>5</b> | 0.570            | 0.132          |                  | 0.720            | disappear        |                    | 0.150                |                 |                   |
|          | 0.134            | 0.067          | 0.1008           | 0.129            | -0.050           | 0.039              | -0.005               | -0.117          | -0.06             |
|          | -1.226           | -1.422         |                  | disappear        | -1.169           |                    |                      | 0.253           |                   |
| <b>6</b> | 0.282            | n.o            |                  | disappear        | n.o              |                    |                      |                 |                   |
|          | 0.071            | -0.086         | -0.0076          | 0.148            | 0.0036           | 0.076              | 0.076                | 0.090           | 0.08              |
|          | n.o              | -0.982         |                  | n.o              | disappear        |                    |                      |                 |                   |
|          | n.o              | -1.278         |                  | n.o              | diappear         |                    |                      |                 |                   |

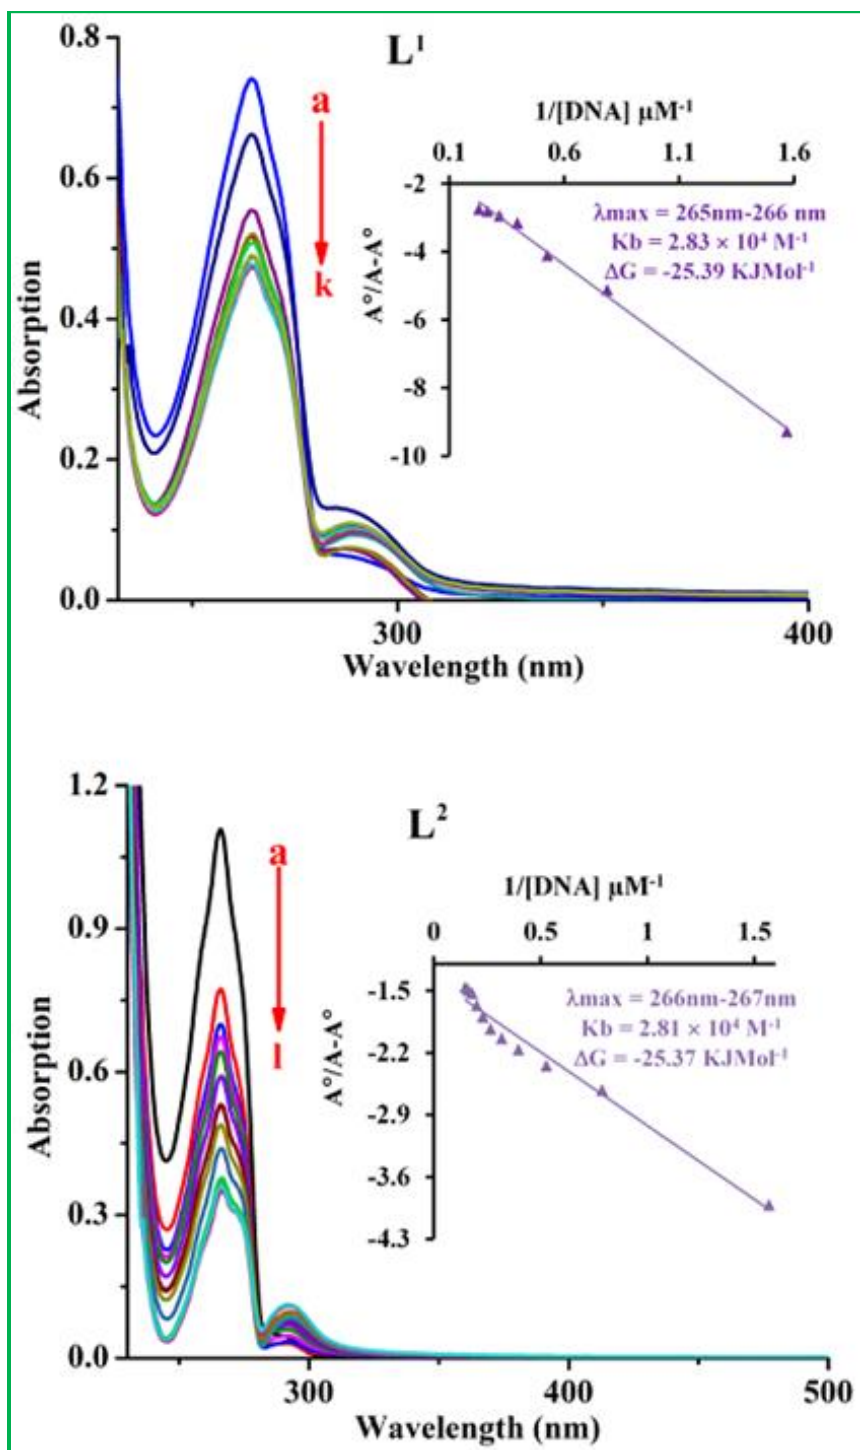

**Figure S3.** UV-visible absorption spectra of ligand acids **L<sup>1</sup>** and **L<sup>2</sup>** in the absence (a in each case) and in the presence of incremental addition, i.e., 0.63-6.631  $\mu\text{M}$  (**L<sup>1</sup>**), and 0.63-4.41  $\mu\text{M}$  (**L<sup>2</sup>**), respectively. Whereas the inside graph reveals the values of  $K_b$  and  $\Delta G$  calculated from graph plotted between the absorption and DNA concentration.

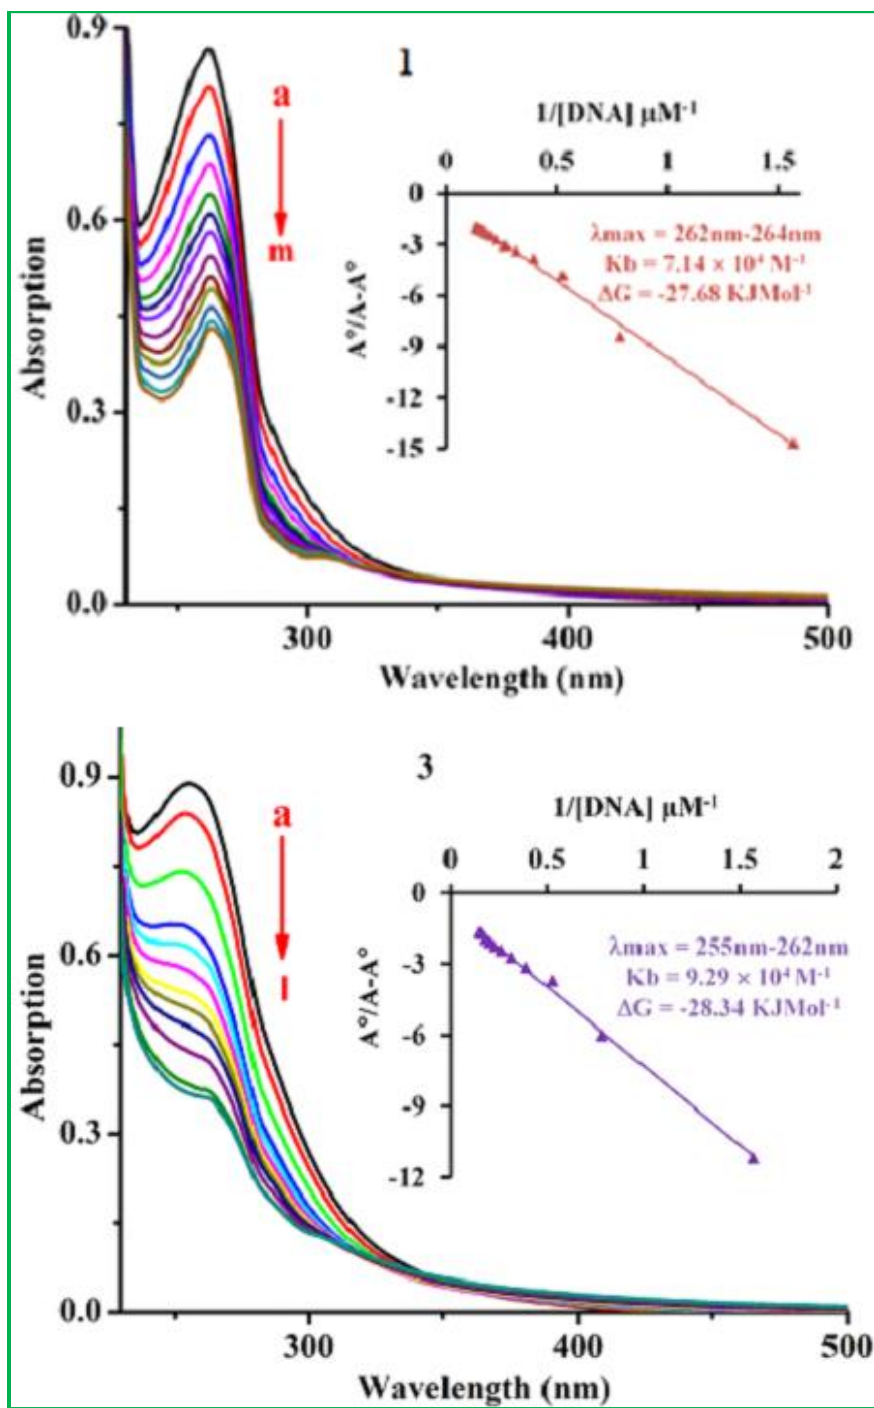

**Figure S4.** UV-visible absorption spectra of complexes **1** and **3** in the absence (**a** in each case) and in the presence of incremental addition, i.e., 0.63-8.19  $\mu M$  (**1**), 0.63-5.67  $\mu M$  (**3**, respectively). Whereas the inside graph reveals the values of  $K_b$  and  $\Delta G$  calculated from graph plotted between the absorption and DNA concentration.

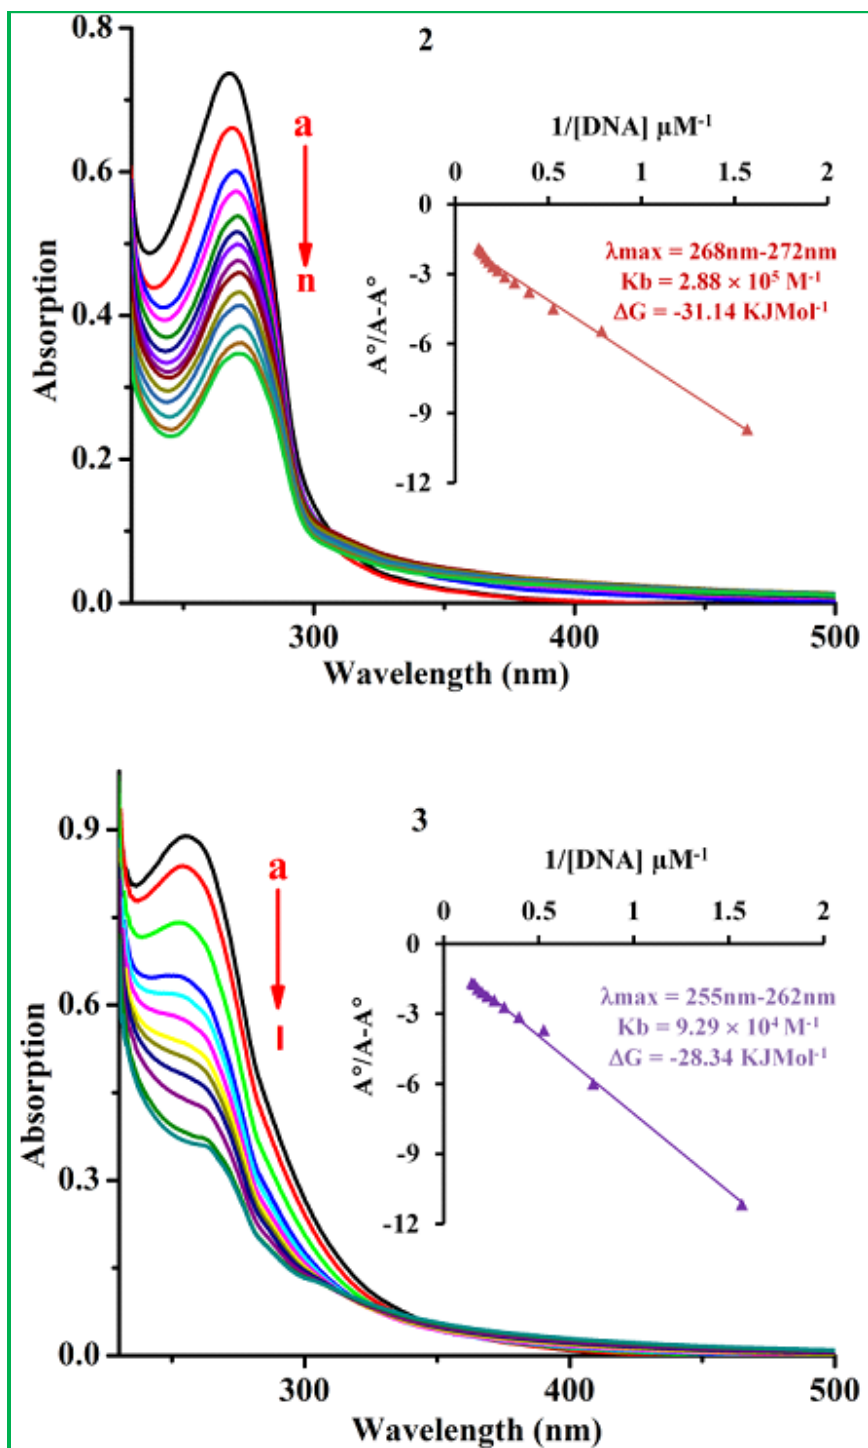

**Figure S5.** UV-visible absorption spectra of complexes **2** and **3** in the absence (**a** in each case) and in the presence of incremental addition, i.e., 0.63-8.19  $\mu\text{M}$  (**2**), 0.63-5.04  $\mu\text{M}$  (**3**, respectively. Whereas the inside graph reveals the values of  $K_b$  and  $\Delta G$  calculated from graph plotted between the absorption and DNA concentration.

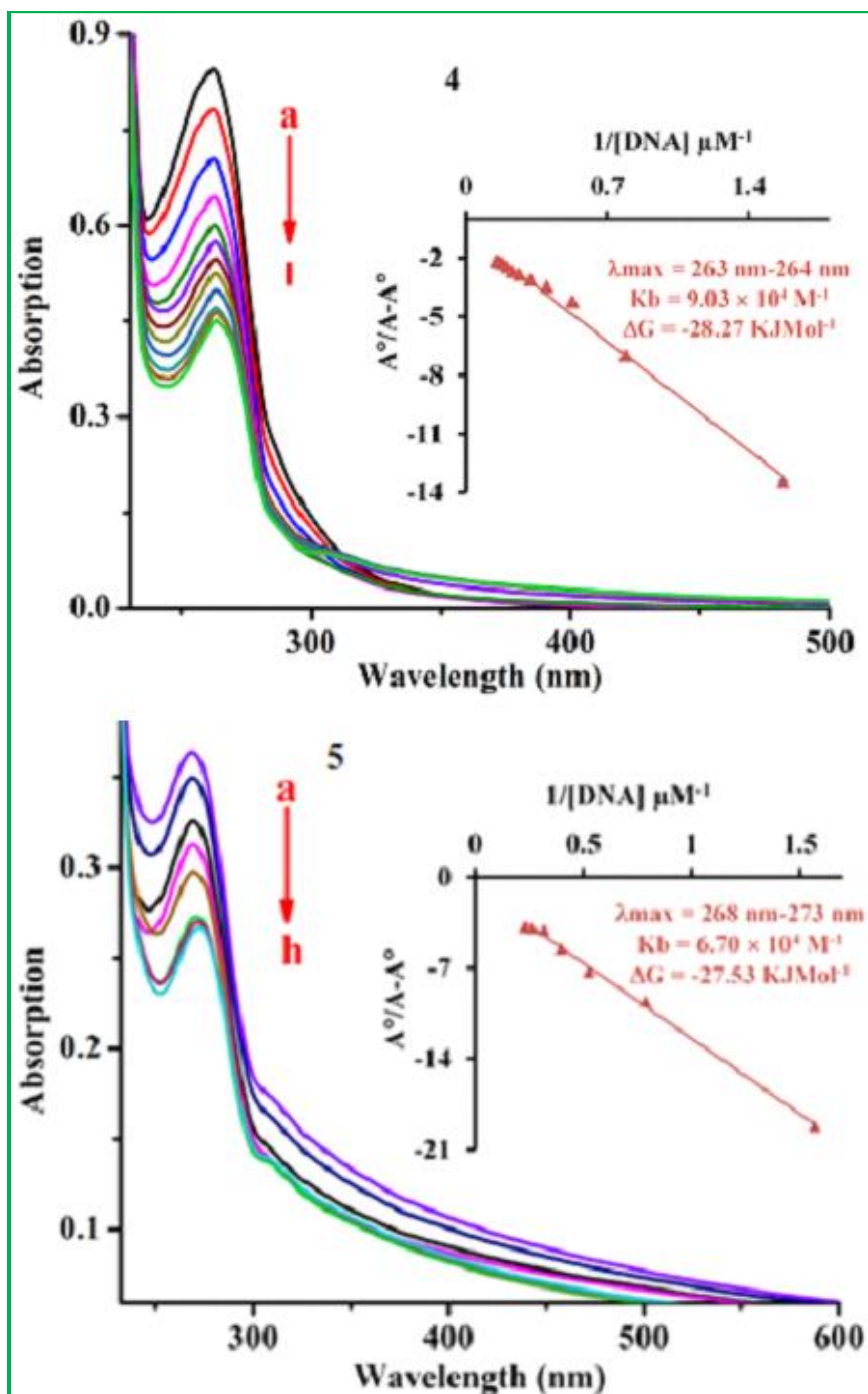

**Figure S6.** UV-visible absorption spectra of complexes **4** and **5** in the absence (a in each case) and in the presence of incremental addition, i.e., 0.63-5.04  $\mu\text{M}$  (**4**) and 0.63-4.41  $\mu\text{M}$  (**5**), respectively. Whereas the inside graph reveals the values of  $K_b$  and  $\Delta G$  calculated from graph plotted between the absorption and DNA concentration.

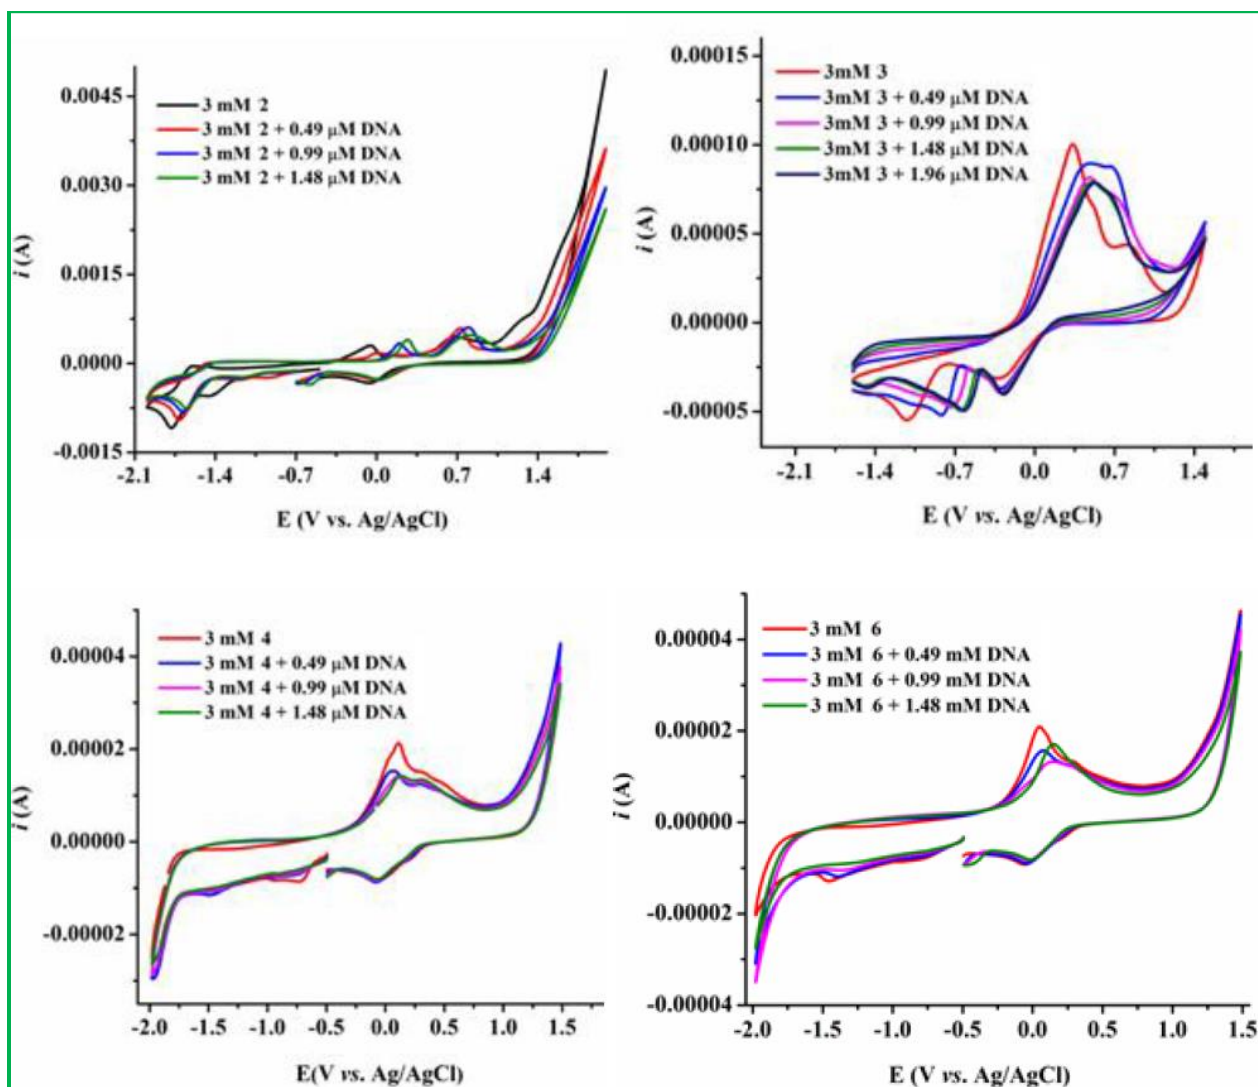

**Figure S7:** Cyclic voltammograms of the complexes 2, 3, C4 and 6 in the presence of DNA



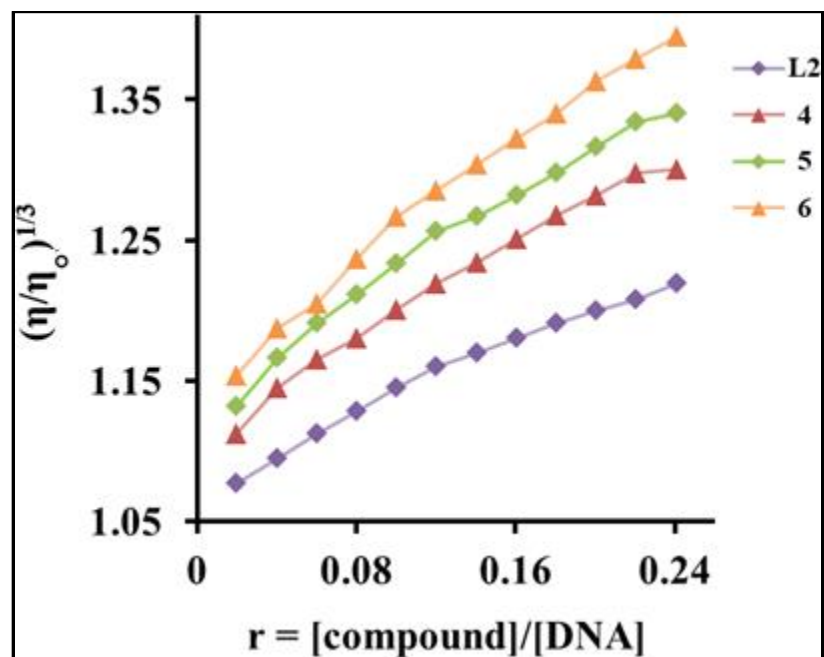

**Figure S8:** Graph presenting the effect on viscosity of SS-DNA by the incremental addition of L<sup>2</sup> and its complexes 4-6
